# Supplementary material
Source: PubMed Central journal article supplement (PMC4130733)
Supplement: cbt-15-1404-s01.pdf [file cbt-15-1404-s01.pdf]

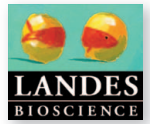

## **Supplemental Material to:**

**Zhen Zhao, Rui Li, Sha Sha, Qiong Wang, Weidong Mao,  
and Tao Liu**

**Targeting HER3 with miR-450b-3p suppresses breast  
cancer cells proliferation**

**Cancer Biology & Therapy 2014; 15(10)**

**<http://dx.doi.org/10.4161/cbt.29923>**

**<http://www.landesbioscience.com/journals/cbt/article/29923/>**

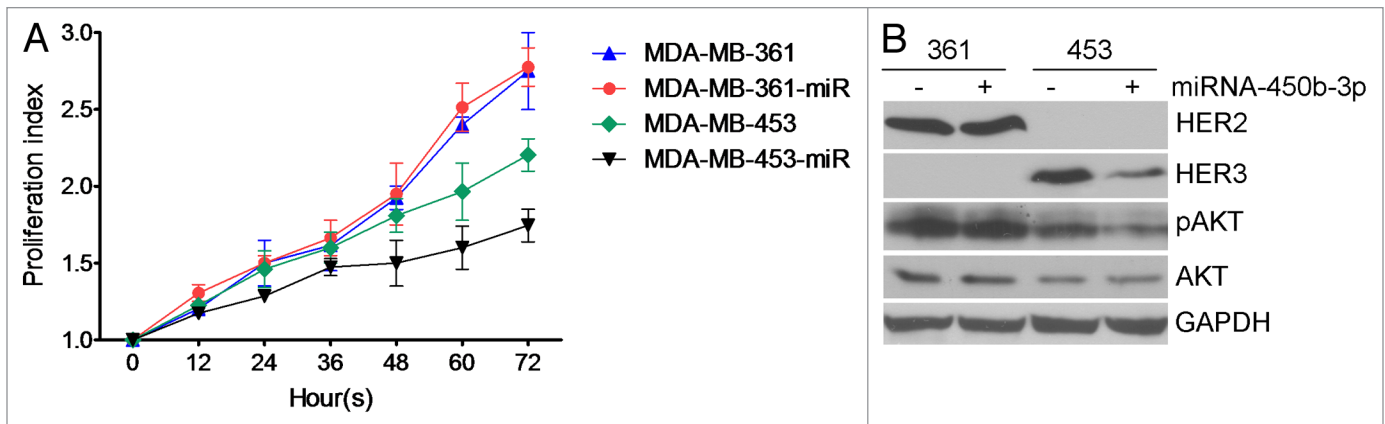

**Figure S1.** The effects of miR-450b-3p on the proliferation of different stable cancer cells. (A) The method of establishment of stable cell lines was as described in Materials and Methods. The proliferation index was evaluated using WST-1 staining. Briefly, 5000 cells were seeded in 2 mL medium per well in a 24-well plate, and then 100  $\mu$ L cell suspends were harvested in specific time points and were stained by WST-1. OD values were normalized by initial cells. B, The HER2, HER3, and AKT pathways were assessed by western blot in stable transfected cells and control cells. The results are representative of three independent experiments.

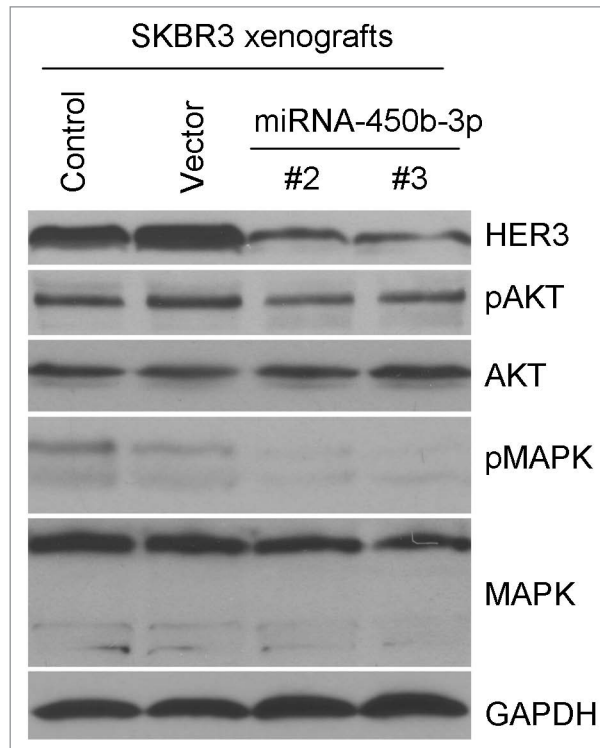

**Figure S2.** The status of HER3 and AKT pathway in SKBR3 xenografts. The status of HER3 and AKT pathway in SKBR3 xenografts were assessed by western blot. The results are representative of three independent experiments.
